# Supplementary material for: Dose Optimization of Vancomycin for Critically Ill Patients Undergoing CVVH: A Prospective Population PK/PD Analysis
Source: MDPI journal article supplement (doi:10.3390/antibiotics10111392), 2021-11-13
Supplement: s1 [file s1]

## Supplementary Materials

**Table S1.** The first round of forward inclusion results.

| No. of model | Description    | Function form | OFV     | ΔOFV   | <i>P</i> value |
|--------------|----------------|---------------|---------|--------|----------------|
| 1            | base model     | -             | 585.337 | 0      | -              |
| 2            | add AGE on CL  | power         | 612.126 | 26.789 | > 0.05         |
| 3            | add SEX on CL  | proportional  | 609.596 | 24.259 | > 0.05         |
| 4            | add WT on CL   | power         | 611.876 | 26.539 | > 0.05         |
| 5            | add BMI on CL  | power         | 608.899 | 23.562 | > 0.05         |
| 6            | add APA on CL  | power         | 612.288 | 26.951 | > 0.05         |
| 7            | add SOFA on CL | power         | 610.306 | 24.969 | > 0.05         |
| 8            | add SBP on CL  | power         | 606.092 | 20.755 | > 0.05         |
| 9            | add DBP on CL  | power         | 607.909 | 22.572 | > 0.05         |
| 10           | add HR on CL   | power         | 597.57  | 12.233 | > 0.05         |
| 11           | add RE on CL   | power         | 609.334 | 23.997 | > 0.05         |
| 12           | add TEM on CL  | power         | 612.162 | 26.825 | > 0.05         |
| 13           | add UV on CL   | exponential   | 606.985 | 21.648 | > 0.05         |
| 14           | add PLT on CL  | linear        | 601.857 | 16.52  | > 0.05         |
| 15           | add RBC on CL  | exponential   | 611.71  | 26.373 | > 0.05         |
| 16           | add WBC on CL  | power         | 612.274 | 26.937 | > 0.05         |
| 17           | add ALP on CL  | power         | 611.234 | 25.897 | > 0.05         |
| 18           | add ALT on CL  | exponential   | 611.903 | 26.566 | > 0.05         |
| 19           | add TBIL on CL | power         | 606.065 | 20.728 | > 0.05         |
| 20           | add ALB on CL  | linear        | 579.983 | -5.354 | < 0.05*        |
| 21           | add BUN on CL  | power         | 602.017 | 16.68  | > 0.05         |
| 22           | add CLCR on CL | exponential   | 604.892 | 19.555 | > 0.05         |
| 23           | add UFR on CL  | linear        | 527.977 | -57.36 | < 0.05*        |

AGE, age; SEX, gender; WT, weight; BMI, body mass index; APA, Acute Physiology and Chronic Health Evaluation II (APACHE II) score; SOFA, Sequential Organ Failure Assessment; SBP, systolic blood pressure; DBP, diastolic blood pressure; HR, heart rate; RE, respiratory rate; TEM, temperature; UV, urine volume; PLT, platelet count; RBC, red blood cell count; WBC, white blood cell count; ALP, alkaline phosphatase; ALT, alanine aminotransferase; TBIL, total bilirubin; ALB, albumin; BUN, blood urea nitrogen; CLCR, creatinine clearance; UFR, ultrafiltration rate.

\*The covariate was statistical significant.

**Table S2.** The second round of forward inclusion results.

| No. of model | Description               | Function form | OFV     | ΔOFV    | <i>P</i> value |
|--------------|---------------------------|---------------|---------|---------|----------------|
| 24           | add ALB on CL based on 23 | power         | 509.525 | -18.452 | < 0.05*        |

ALB, albumin.

\*The covariate was statistical significant.

**Table S3.** The results of backward elimination.

| No. of model | Description               | Function form | OFV     | $\Delta$ OFV | <i>P</i> value |
|--------------|---------------------------|---------------|---------|--------------|----------------|
| 25           | eliminate ALB based on 24 | linear        | 527.977 | 18.425       | < 0.001*       |
| 26           | eliminate UFR based on 24 | power         | 578.111 | 68.586       | < 0.001*       |

ALB, albumin; UFR, ultrafiltration rate.

\*The covariate was statistical significant.
